# Supplementary material for: Similar rates for platination of hairpin loops and single-stranded DNA
Source: Royal Society of Chemistry journal article supplement (doi:10.1039/b302477f), 2003-01-01
Supplement: b302477f.doc [file b302477f.doc]

*Supplementary material to:*

**Similar rates for platination of hairpin loops and single-stranded DNA**

Johan Kjellström and Sofi K. C. Elmroth*

**Table S1.** Observed pseudo-first-order rate constants as a function of increasing concentration of **I** for the reaction with d(T6s4UT6) and **II** for the reaction with d(T6p(S)T6), at 25 C, pH 5.5 and [cation] = 10 mM.

**Table S2.** Observed pseudo-first-order and apparent second-order rate constants for the reaction of **I** with d(T6s4UT6), d(T6s6IT6), d(CGCGTTs4UTTCGCG), and d(CGCGTTs6ITTCGCG) at 25 C, pH 5.5 and [cation] = 10 mM.

**Table S3.** Observed pseudo-first-order and apparent second-order rate constants for the reaction of **II** with d(T6GT6), d(T6p(S)T6), d(T6s4UT6), d(T6s6IT6), d(CGCGTTGTTCGCG), d(GCGCTTp(S)TTGCGC), d(CGCGTTs4UTTCGCG), and d(CGCGTTs6ITTCGCG) at 25 C, pH 5.5 and [cation] = 10 mM.

**Figure S1.** CD spectrum of d(CGCGTTGTTCGCG) at 25 C, pH 5.5, [oligo] = 9.6  10-5 M and [cation] = 10 mM.

**Figure S2.** DSC trace of d(CGCGTTGTTCGCG) at 25 C, pH 5.5, [oligo] = 1.0  10-4 M and [cation] = 10 mM.

**Figure S3.** UV/vis spectra at 1.5 min interval for the reaction of **I** with d(CGCGTTs6ITTCGCG) at 25 C and pH 5.5, [Pt(II)] = 8.5  10-5 M, [oligo] = 8.3  10-6 M and [cation] = 10 mM.

**Figure S4.** HPLC traces at different reaction times for the reaction between d(CGCGTTs4UTTCGCG) and **II** at 25 C. Inset shows a plot of the normalised integrated HPLC peak areas corresponding to peaks labelled as filled circles *vs.* reaction time. The line represents the best fit of a single exponential to the experimental values.

**Figure S5.** Observed pseudo-first-order rate constants as a function of increasing concentration of **I** (filled circles) for the reaction with d(T6s4UT6) and **II** (open circles) for the reaction with d(T6p(S)T6), at 25 C, pH 5.5 and [cation] = 10 mM.

**Table S1.** Observed pseudo-first-order rate constants as a function of increasing concentration of **I** for the reaction with d(T6s4UT6) and **II** for the reaction with d(T6p(S)T6), at 25 C, pH 5.5 and [cation] = 10 mM.a

| 105  CPt, M | 106  COligo, M | 103  *k*obsd, s-1 |
| --- | --- | --- |
| Reaction of **I** with d(T6s4UT6) | | |
| 2.10 | 1.32 | 0.70  0.2 |
| 3.60 | 0.909 | 1.1  0.6 |
| 5.30 | 1.37 | 1.7  0.2 |
| 8.03 | 1.32 | 2.5  0.9 |
|  |  |  |
| Reaction of **II** with d(T6p(S)T6) | | |
| 2.57 | 0.658 | 0.83  0.1 |
| 3.93 | 1.02 | 1.2  0.1 |
| 5.31 | 1.30 | 1.5  0.4 |
| 8.00 | 1.32 | 2.4  0.6 |

a Buffered with KHC8H4O4 and pH adjusted with HClO4.

**Table S2.** Observed pseudo-first-order and apparent second-order rate constants for the reaction of **I** with d(T6s4UT6), d(T6s6IT6), d(CGCGTTs4UTTCGCG), and d(CGCGTTs6ITTCGCG) at 25 C, pH 5.5 and [cation] = 10 mM.a

| 105  CPt, M | 106  COligo, M | 103  *k*obsd, s-1 | *k*2,app, M-1s-1 |
| --- | --- | --- | --- |
| d(T6s4UT6) | | | |
| 5.32 | 1.37 | 1.7  0.2 | 32  4 |
| d(T6s6IT6) | | | |
| 5.32 | 1.32 | 4.6  0.3 | 87  4 |
| d(CGCGTTs4UTTCGCG) | | | |
| 5.30 | 1.43 | 2.3  0.2 | 44  4 |
| d(CGCGTTs6ITTCGCG) | | | |
| 5.30 | 1.29 | 7.4  0.3 | 140  6 |

a Buffered with KHC8H4O4 and pH adjusted with HClO4.

**Table S3.** Observed pseudo-first-order and apparent second-order rate constants for the reaction of **II** with d(T6GT6), d(T6p(S)T6), d(T6s4UT6), d(T6s6IT6), d(CGCGTTGTTCGCG), d(CGCGTTs4UTTCGCG), d(CGCGTTs6ITTCGCG), and d(GCGCTTp(S)TTGCGC) at 25 C, pH 5.5 and [cation] = 10 mM.a

| 105  CPt, M | 106  COligo, M | 103  *k*obsd, s-1 | *k*2,app, M-1s-1 |
| --- | --- | --- | --- |
| d(T6GT6) | | | |
| 11 | 1.28 | 1.3  0.2 | 12  2 |
| d(T6p(S)T6) | | | |
| 5.31 | 1.30 | 1.70  0.05 | 32  1 |
| d(T6s4UT6) | | | |
| 5.28 | 1.47 | 2.2  0.2 | 42  3 |
| d(T6s6IT6) | | | |
| 5.40 | 1.32 | 5.6  0.2 | 106  5 |
| d(CGCGTTGTTCGCG) | | | |
| 5.28 | 1.32 | 0.74  0.05 | 14  1 |
| d(CGCGTTs4UTTCGCG) | | | |
| 5.28 | 1.47 | 2.1  0.1 | 40  2 |
| d(CGCGTTs6ITTCGCG) | | | |
| 5.32 | 1.43 | 6.7  0.4 | 130  9 |
| d(GCGCTTp(S)TTGCGC) | | | |
| 10.0 | 2.50 | 2.2  0.1 | 22  1 |

a Buffered with KHC8H4O4 and pH adjusted with HClO4.


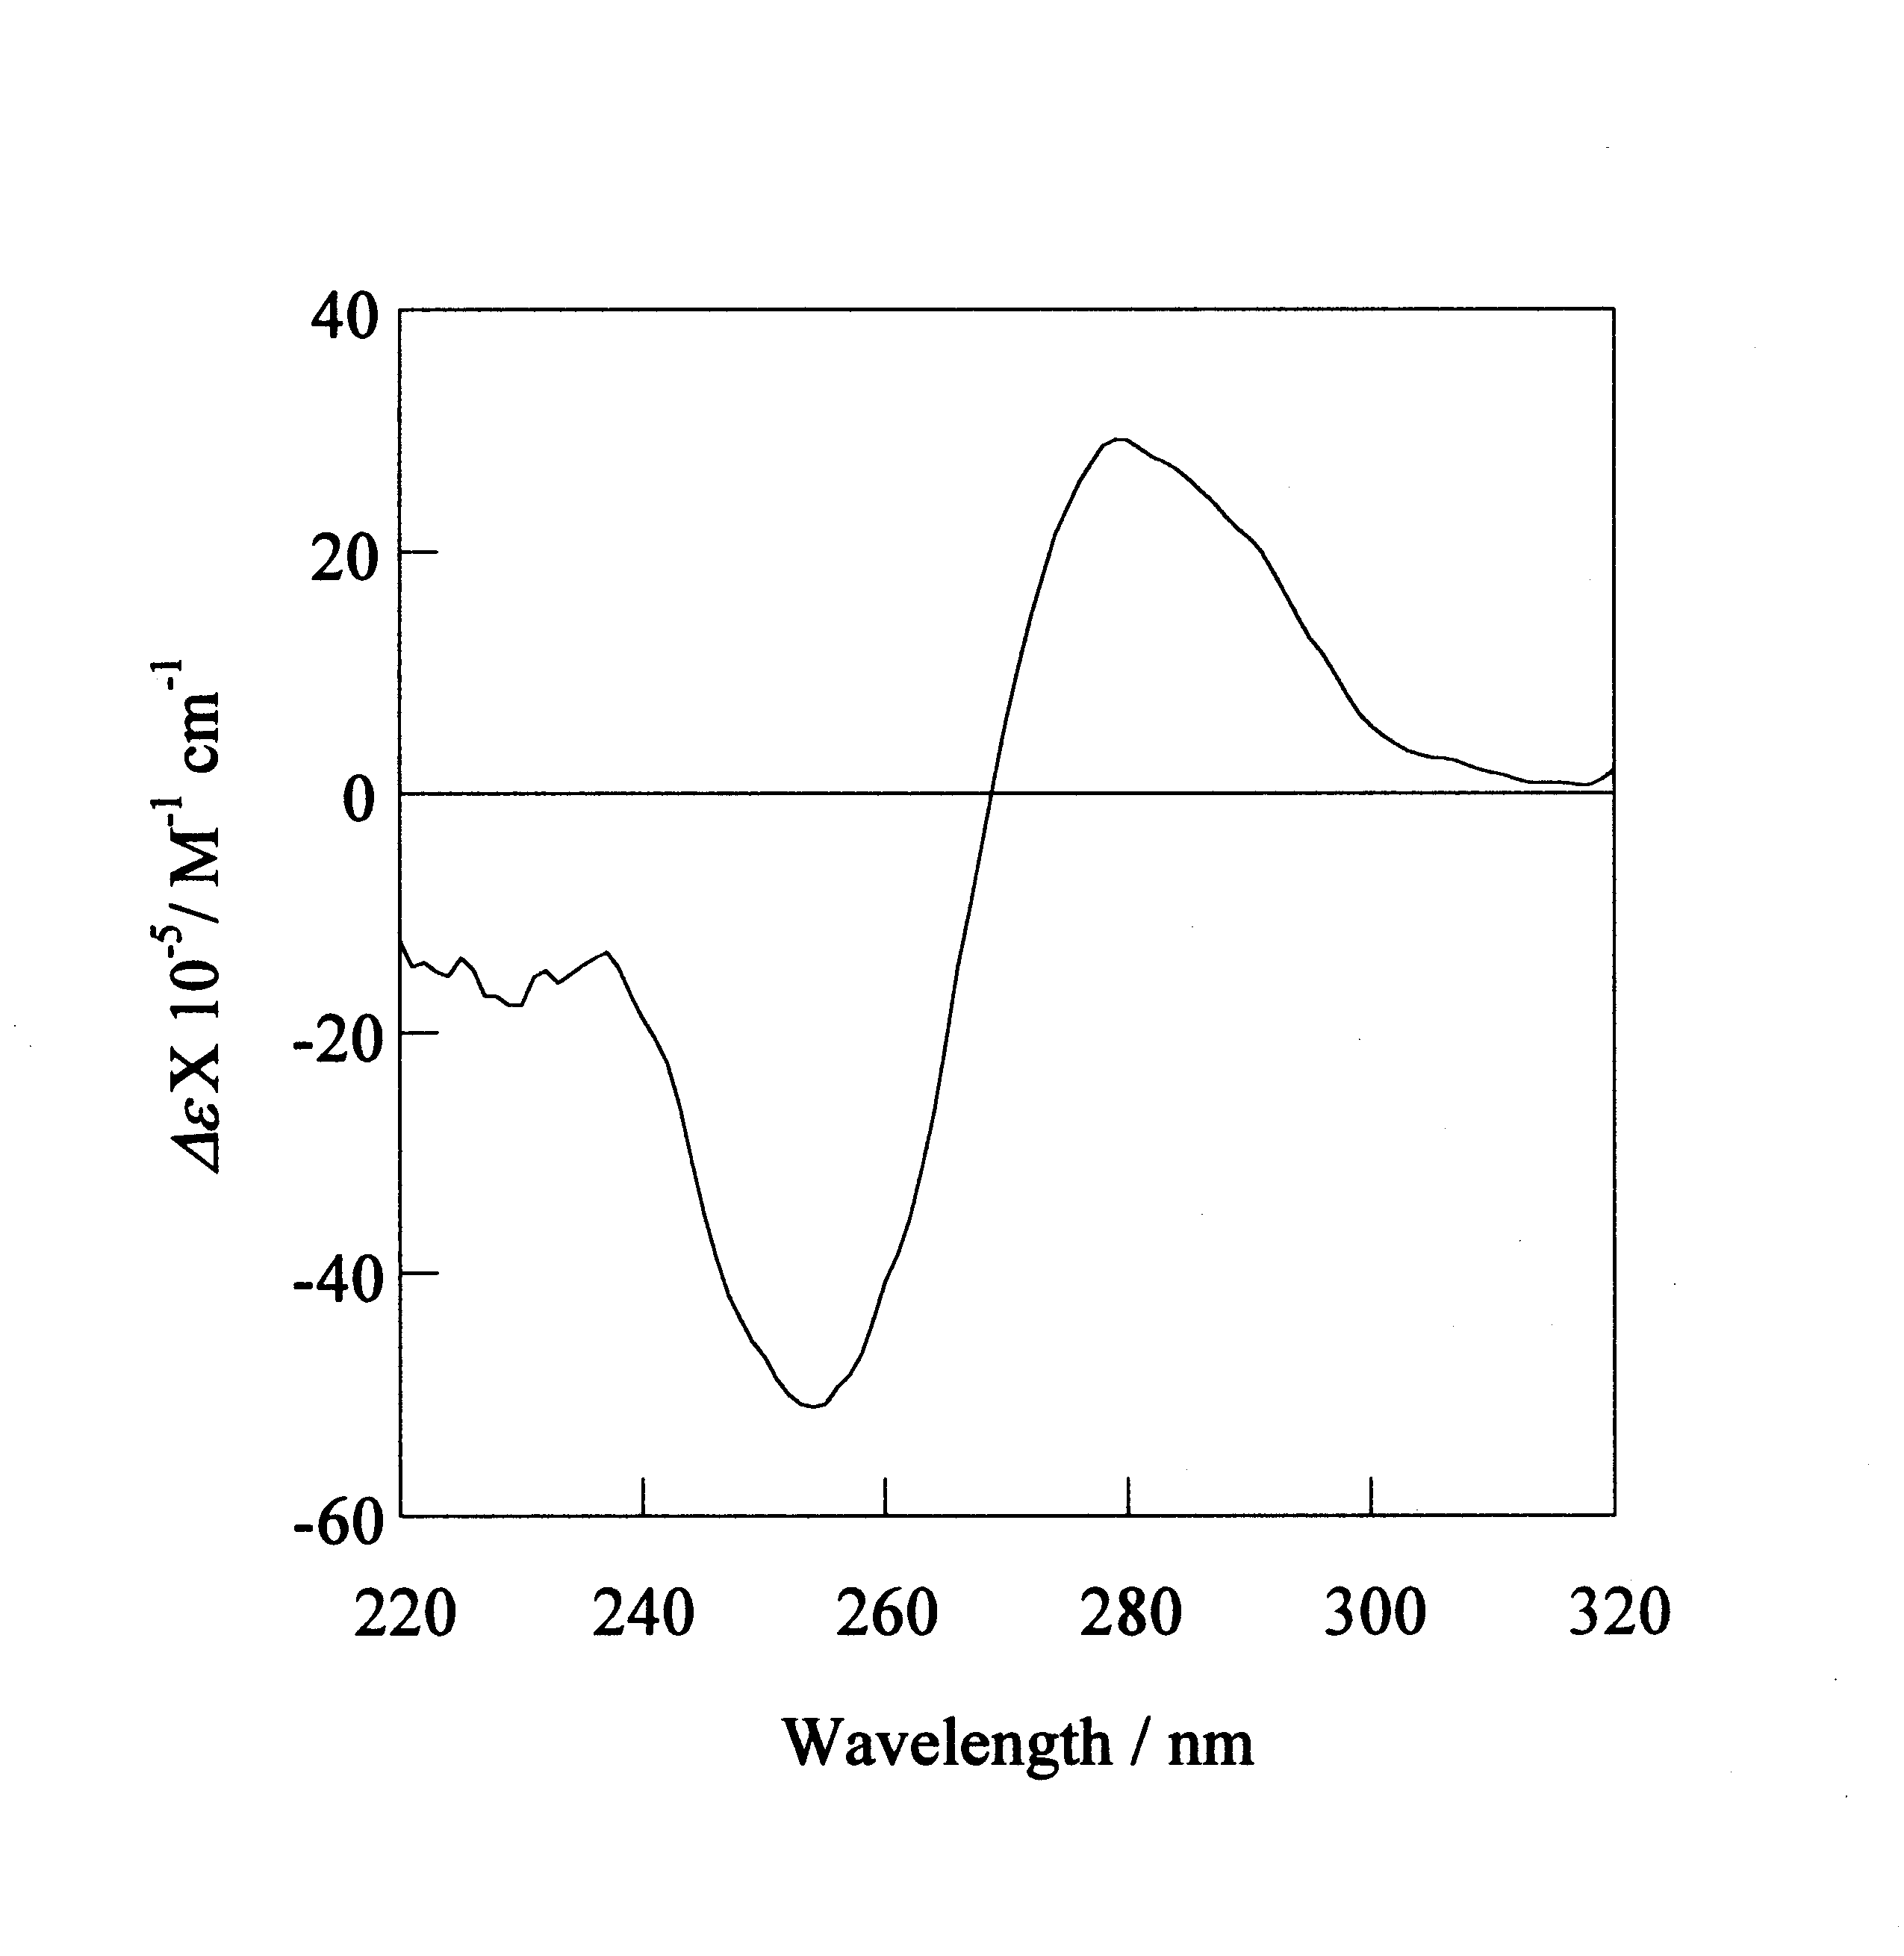


**Figure S1**

**Kjellström and Elmroth**

**
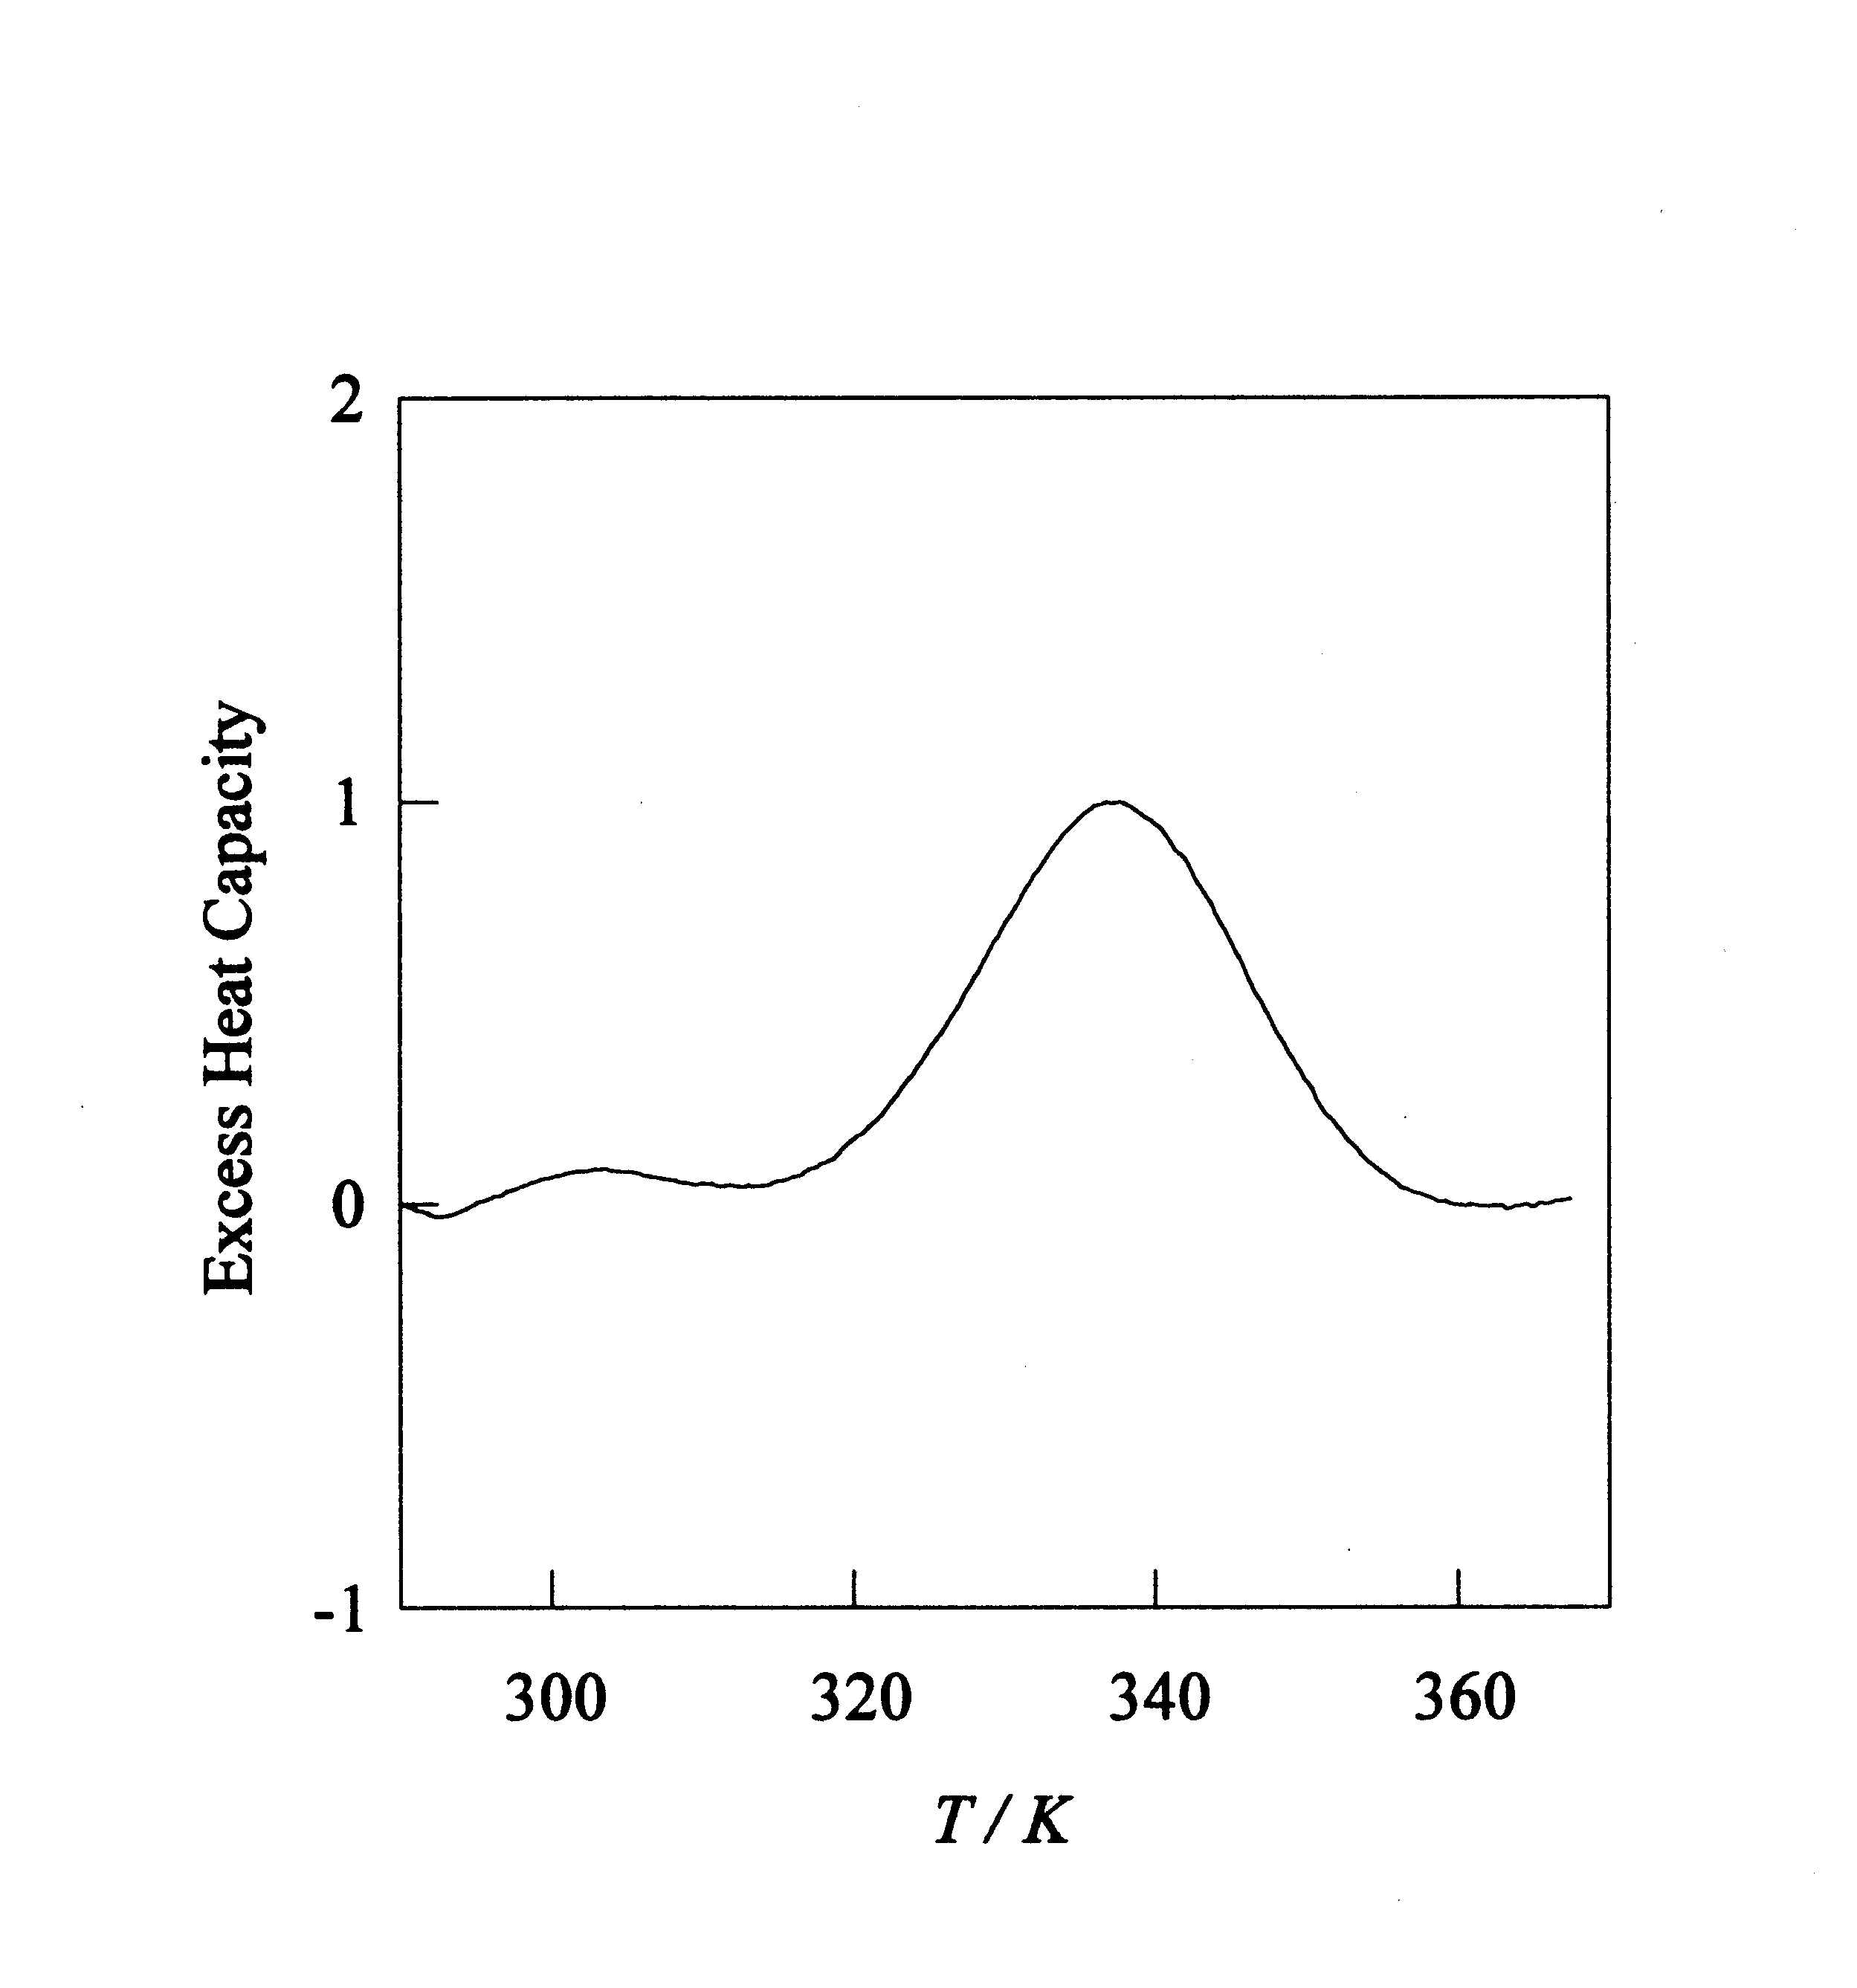
**

**Figure S2**

**Kjellström and Elmroth**

**
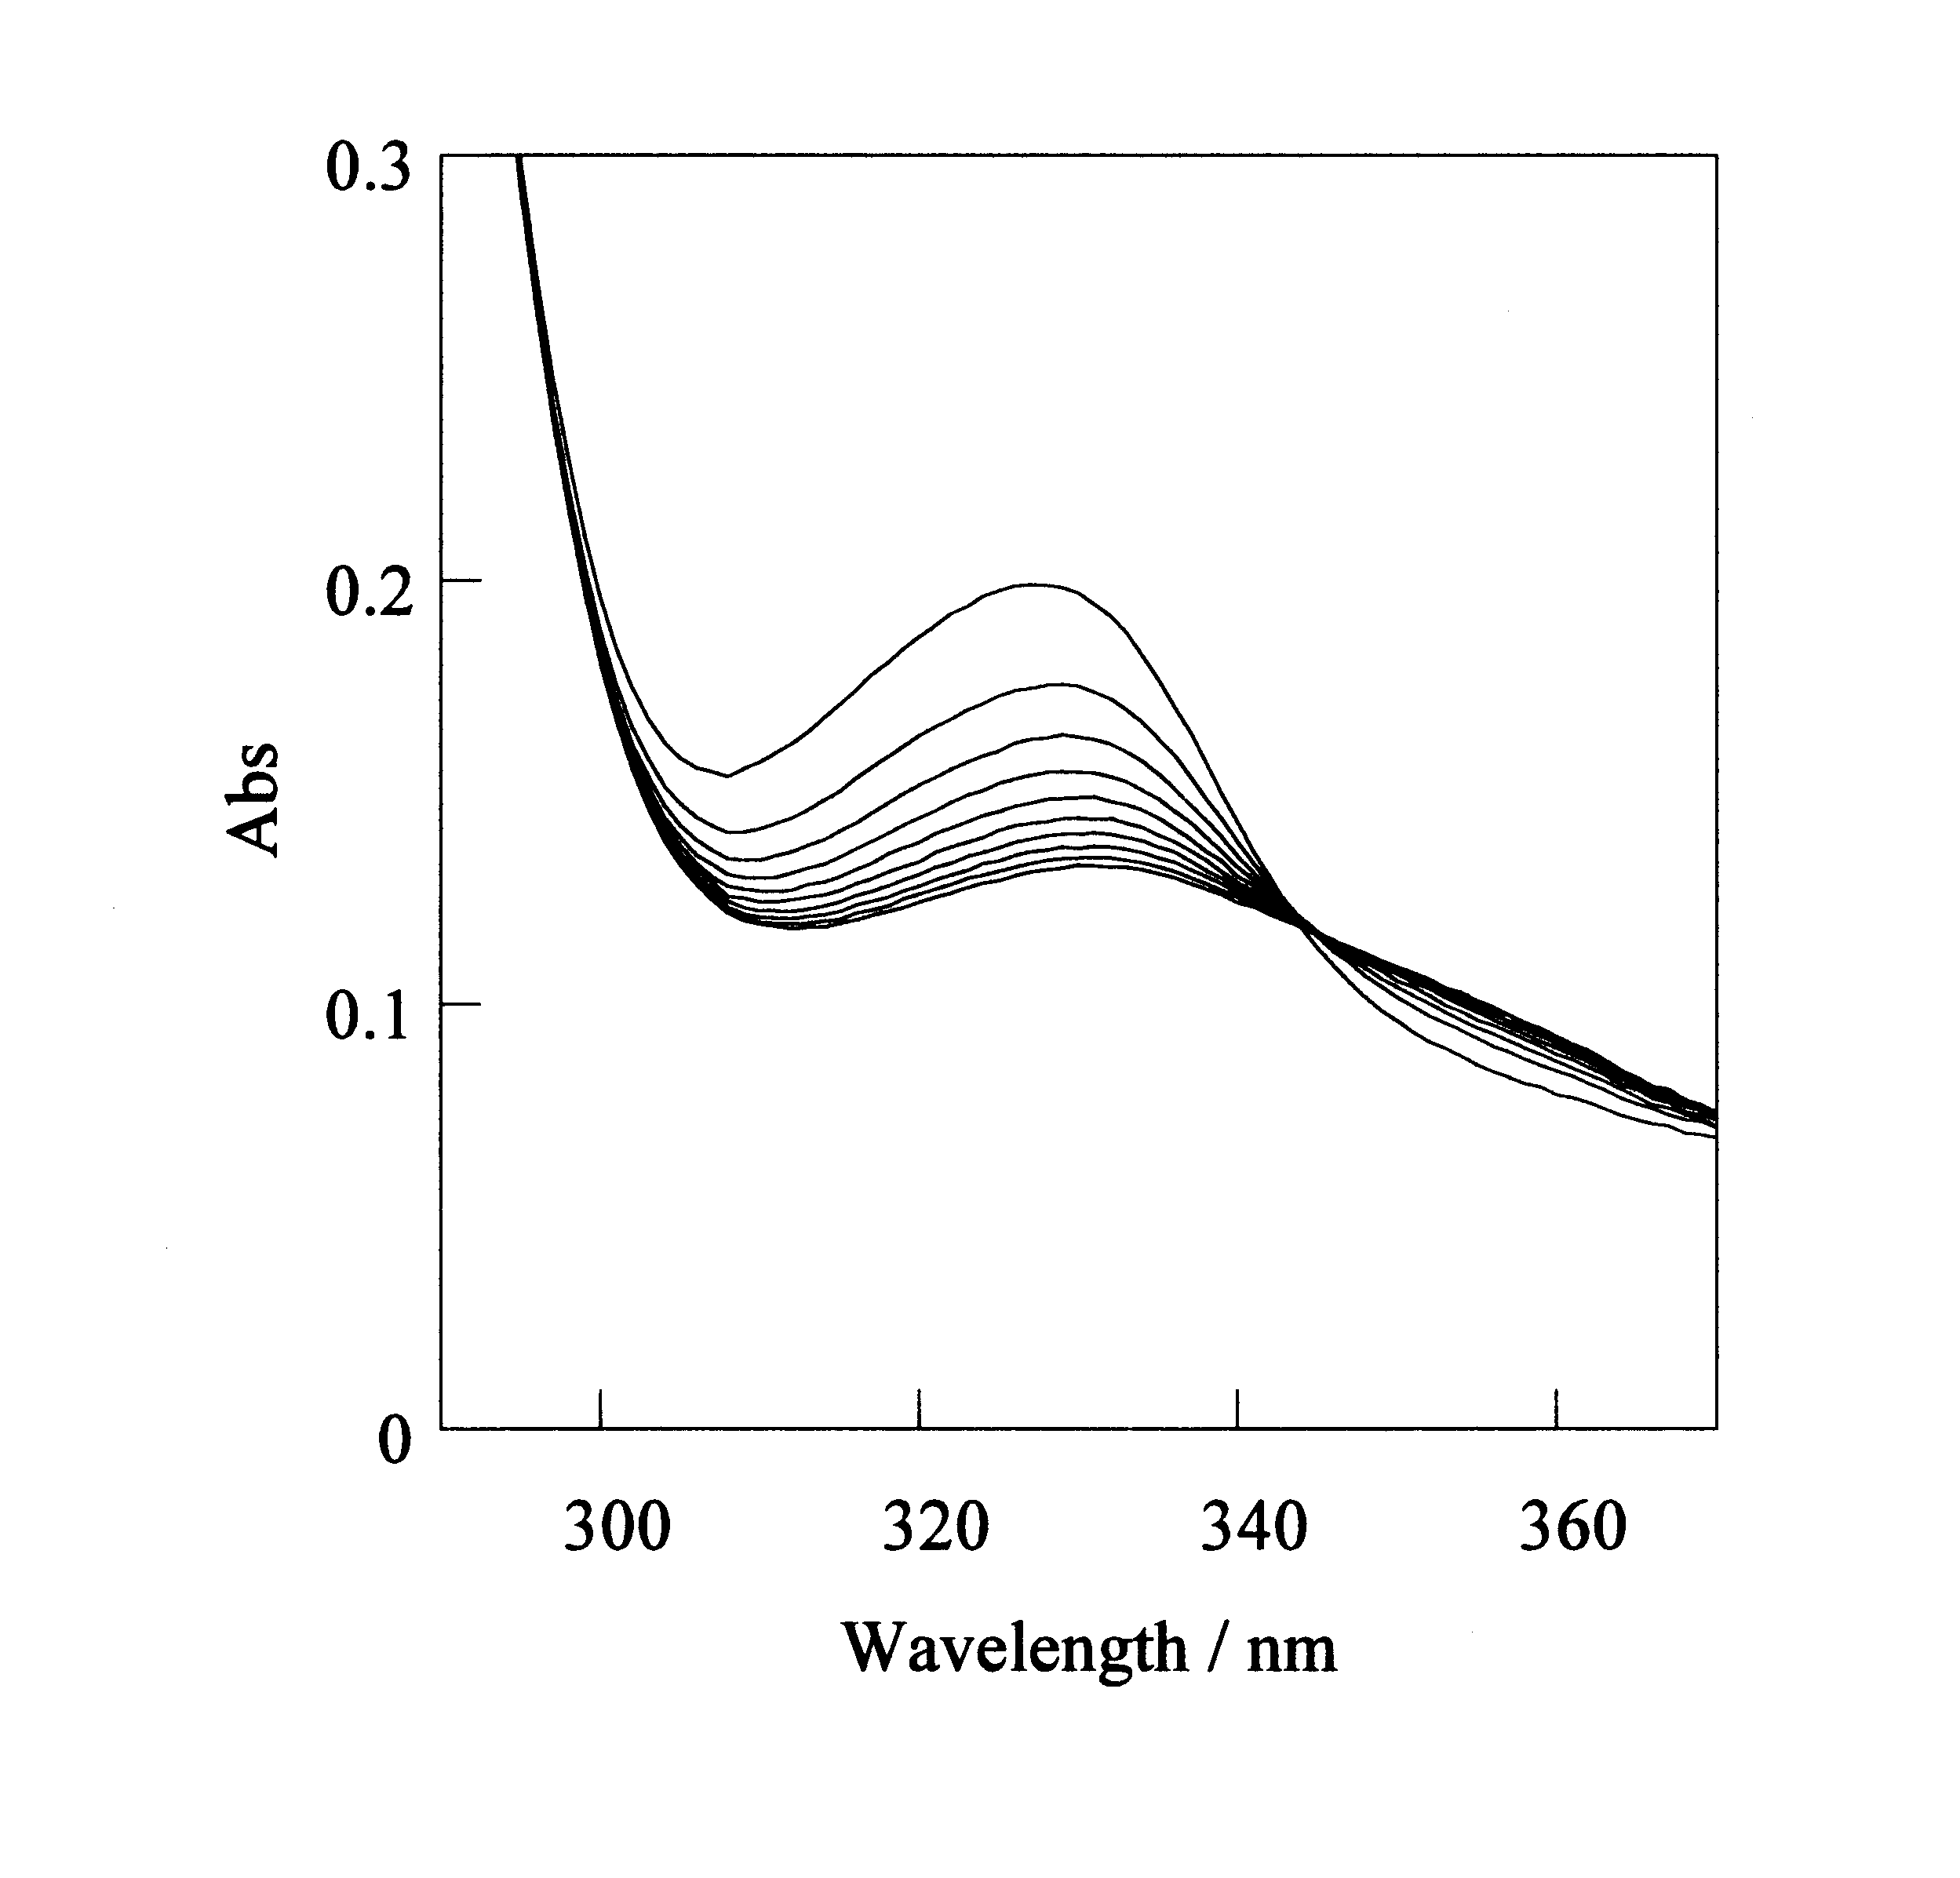
**

**Figure S3**

**Kjellström and Elmroth**

**
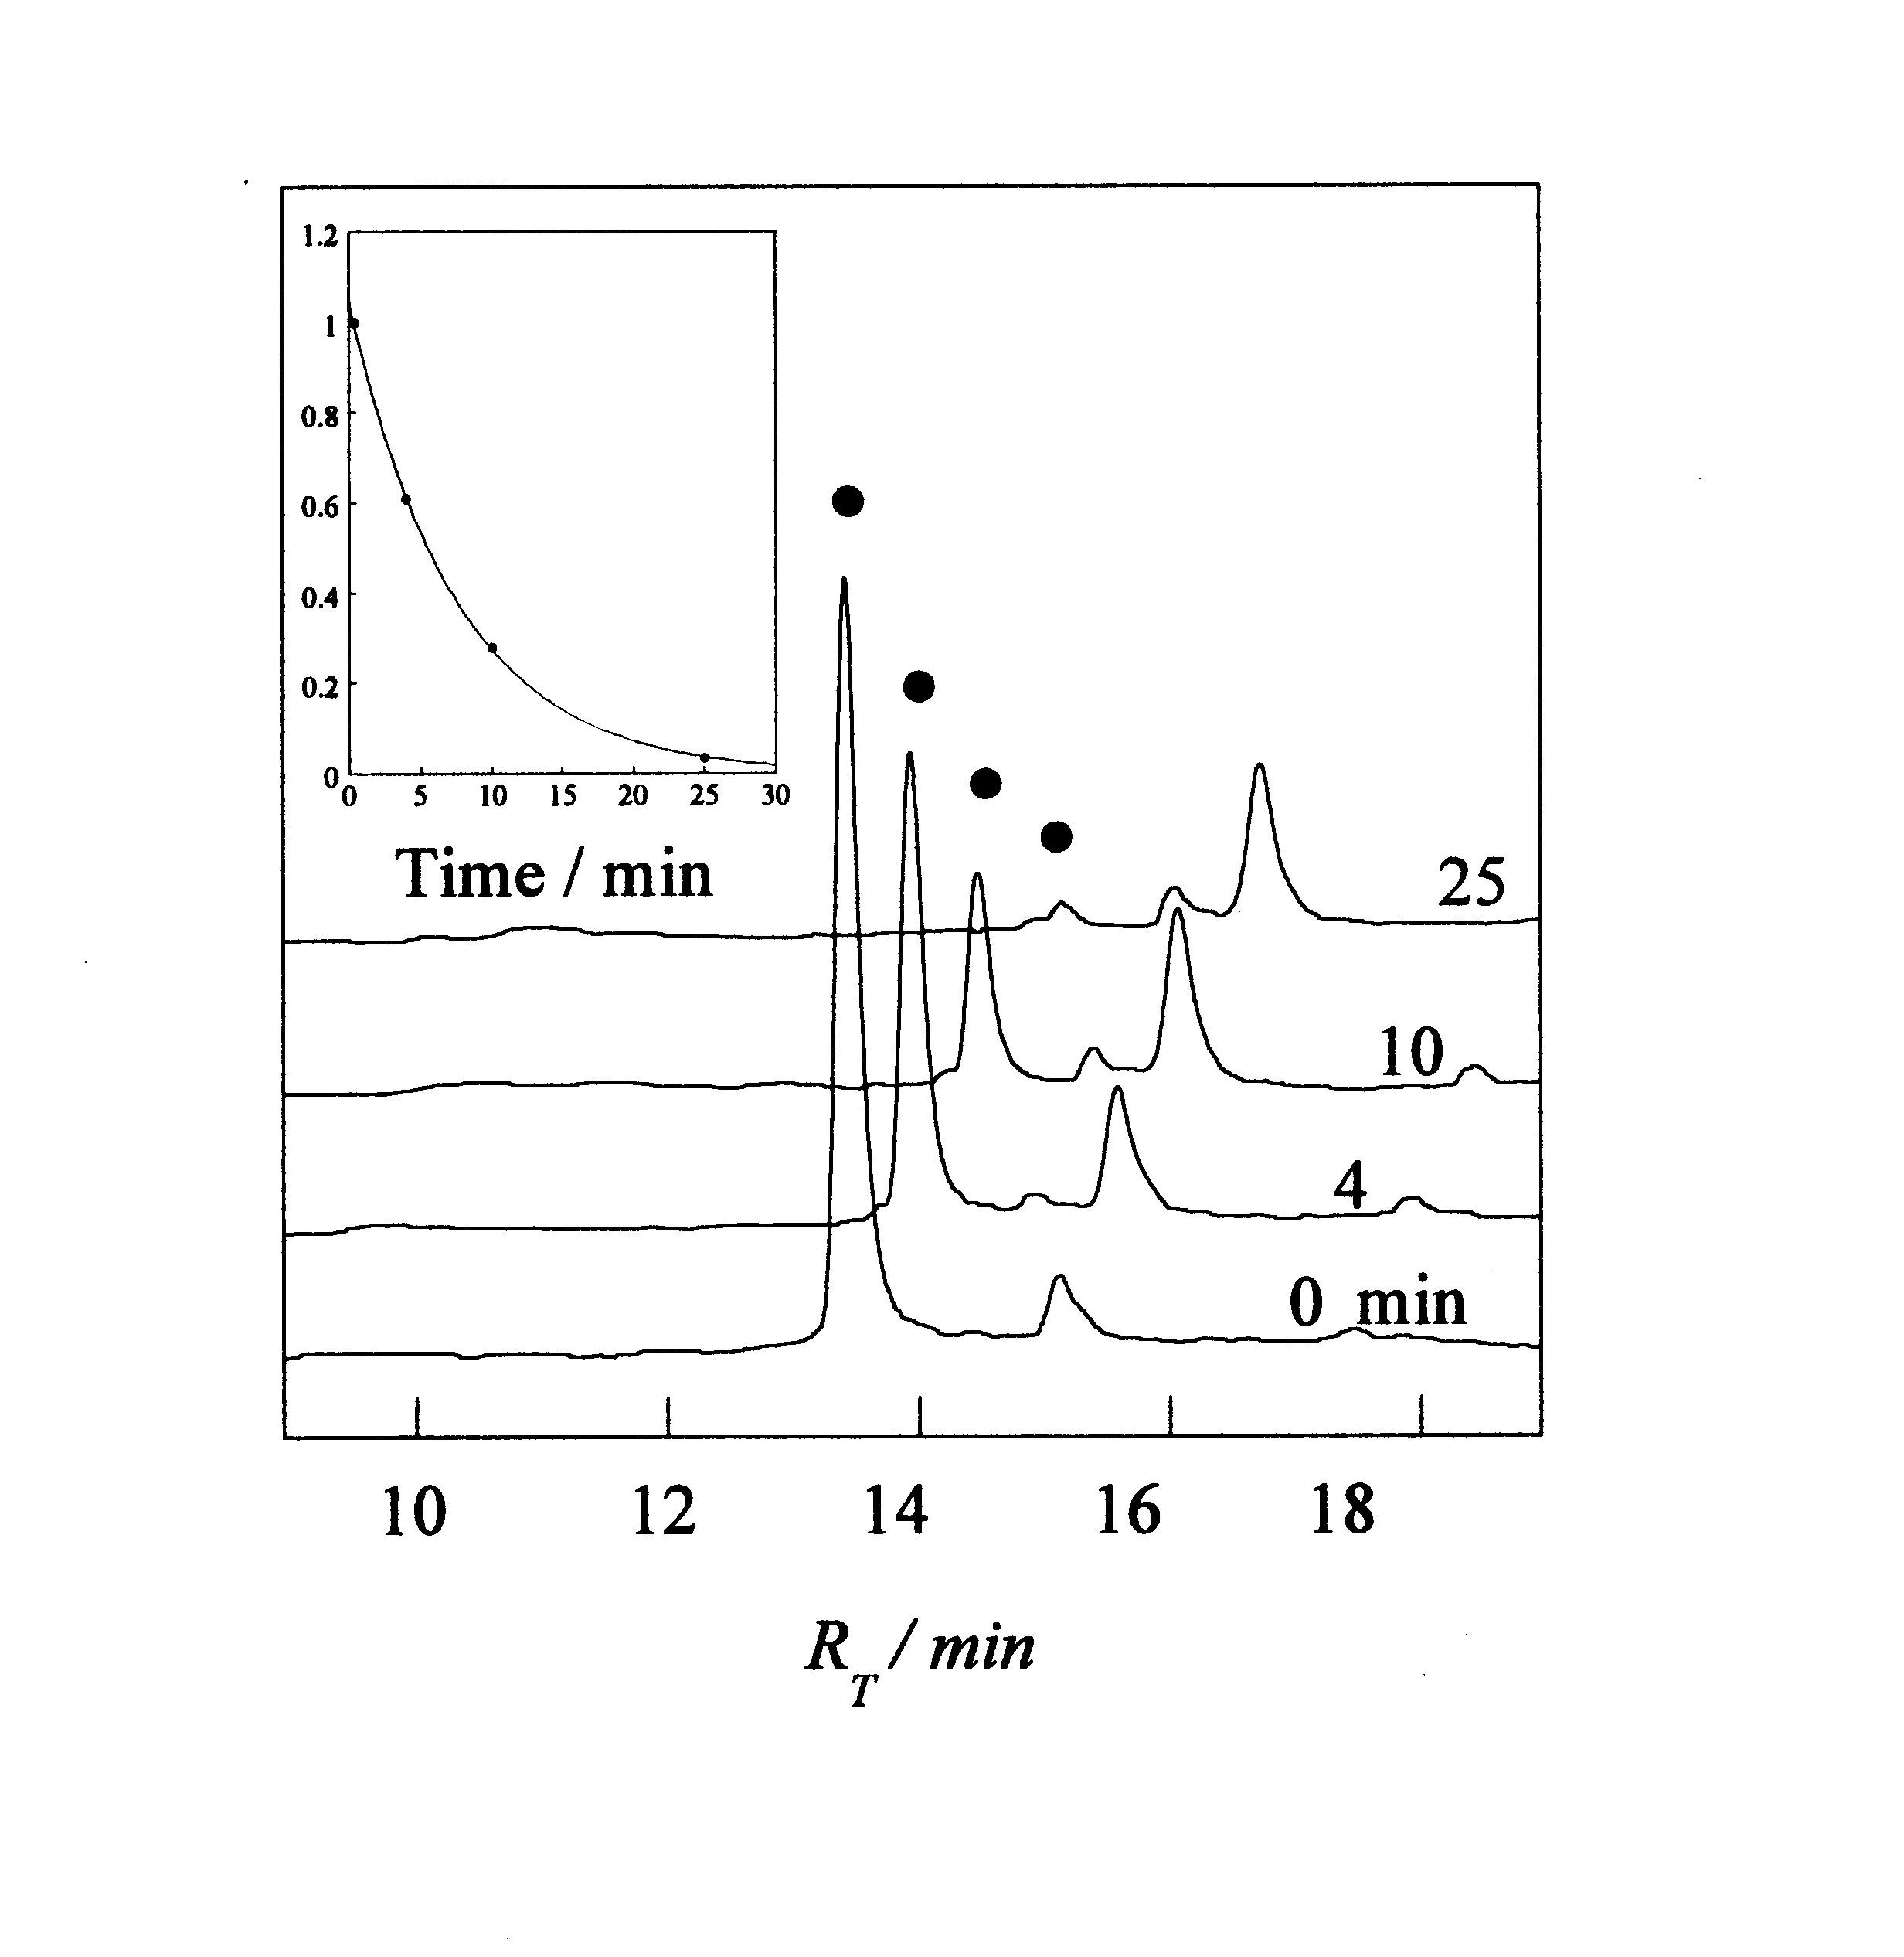
**

**Figure S4**

**Kjellström and Elmroth**

**
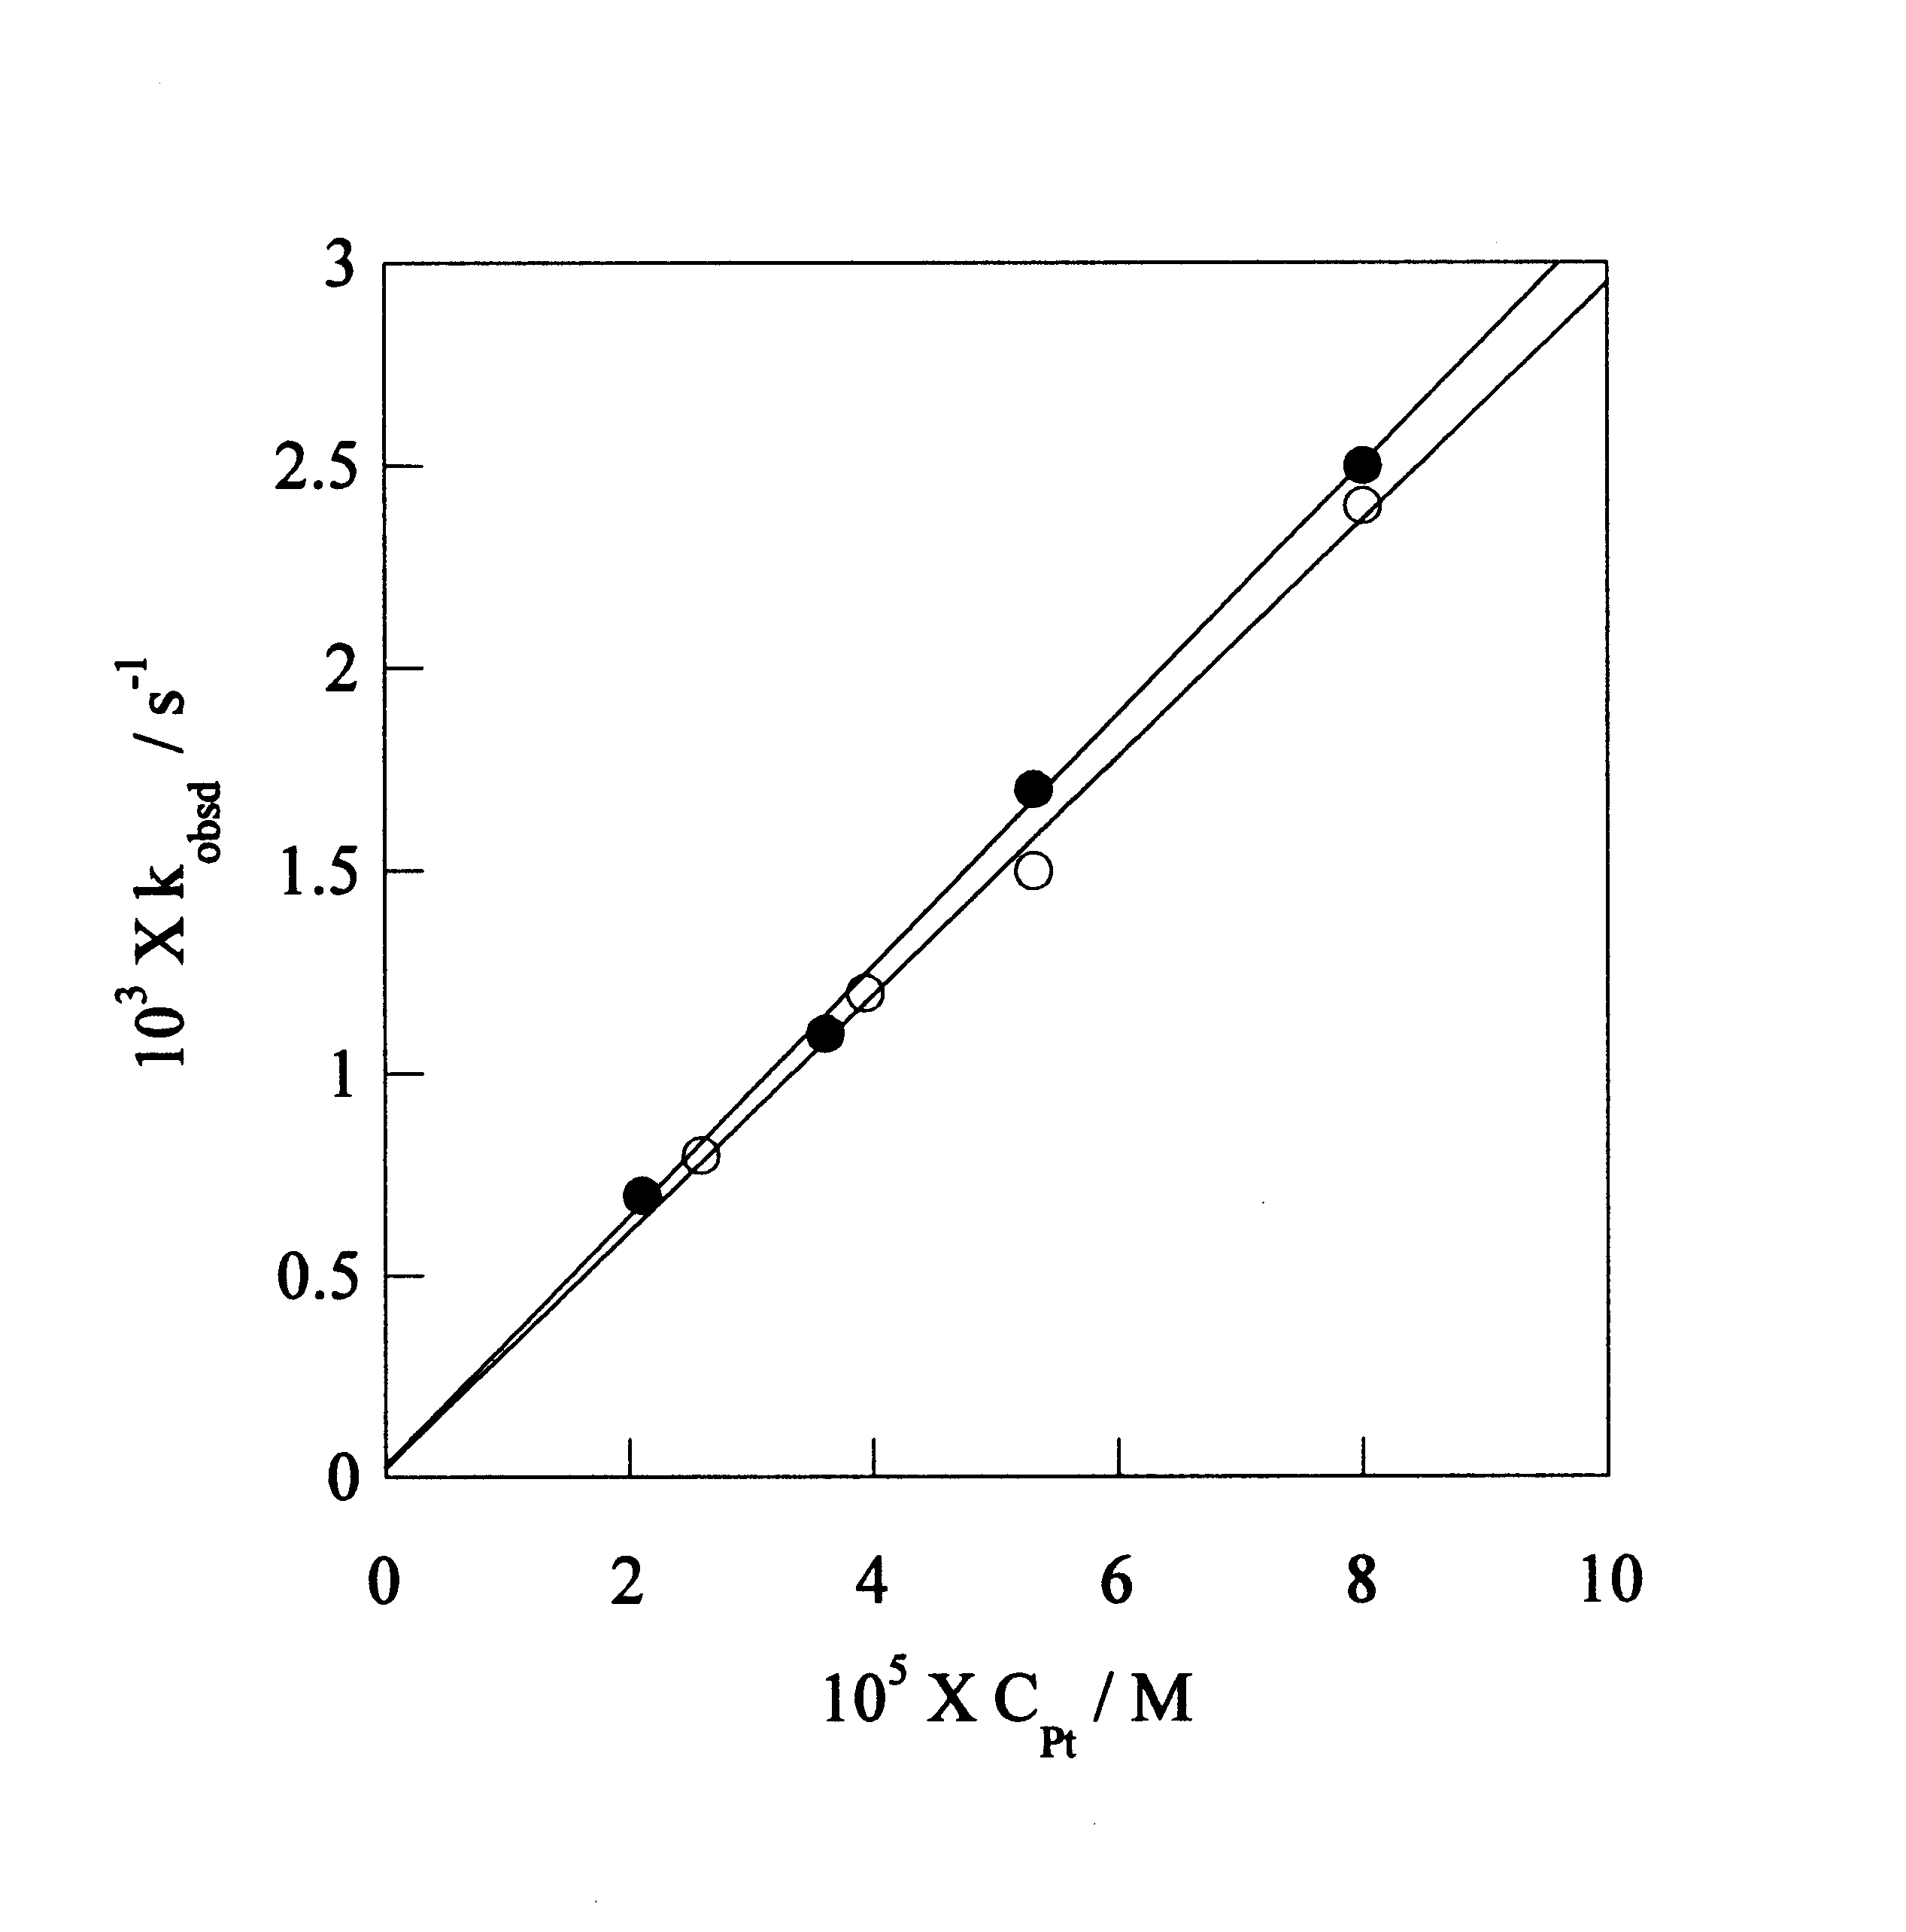
**

**Figure S5**

**Kjellström and Elmroth**
